# Supplementary material for: Safety and efficacy of tofacitinib for up to 9.5 years in the treatment of rheumatoid arthritis: final results of a global, open-label, long-term extension study
Source: PubMed Central journal article supplement (PMC6451219; doi:10.1186/s13075-019-1866-2), 2019-04-05
Supplement: 13075_2019_1866_MOESM4_ESM.pdf [file 13075_2019_1866_MOESM4_ESM.pdf]

**a**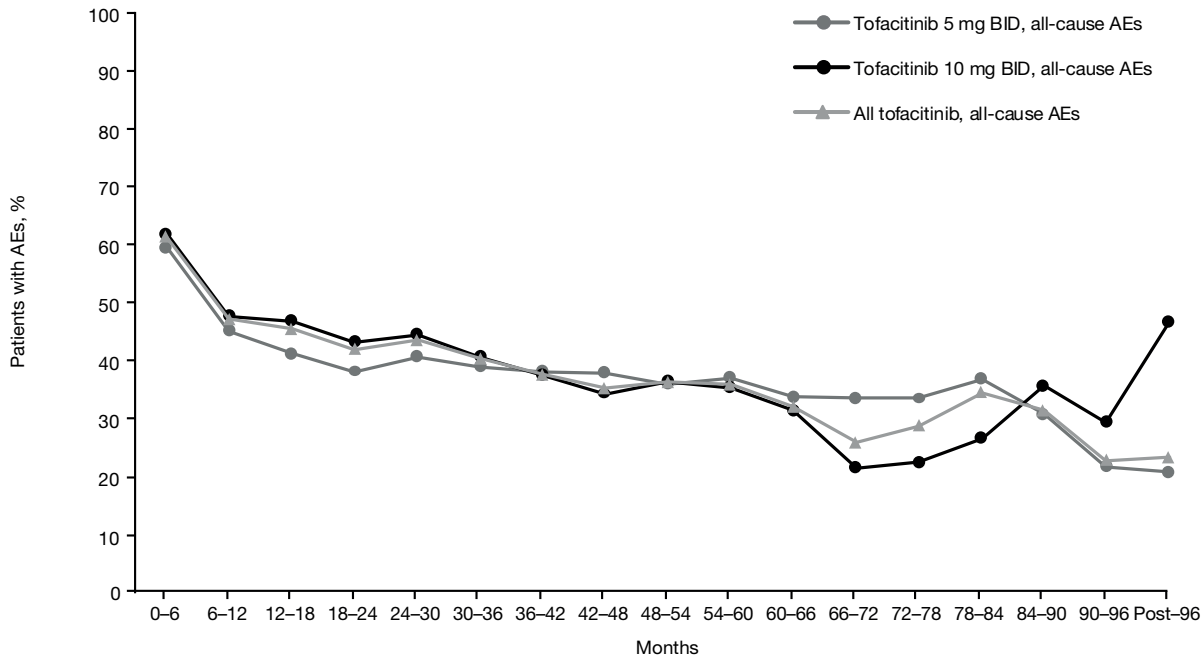

|            |      |      |      |      |      |      |      |      |      |      |      |      |     |     |     |     |     |
|------------|------|------|------|------|------|------|------|------|------|------|------|------|-----|-----|-----|-----|-----|
| 5 mg, N =  | 1123 | 1033 | 969  | 896  | 820  | 774  | 729  | 652  | 558  | 466  | 414  | 379  | 336 | 302 | 273 | 234 | 130 |
| 10 mg, N = | 3358 | 3121 | 2865 | 2660 | 2461 | 2288 | 2162 | 1843 | 1471 | 1172 | 918  | 670  | 262 | 86  | 42  | 34  | 15  |
| All, N =   | 4481 | 4154 | 3834 | 3556 | 3281 | 3062 | 2891 | 2495 | 2029 | 1638 | 1332 | 1049 | 598 | 388 | 315 | 268 | 145 |

**b**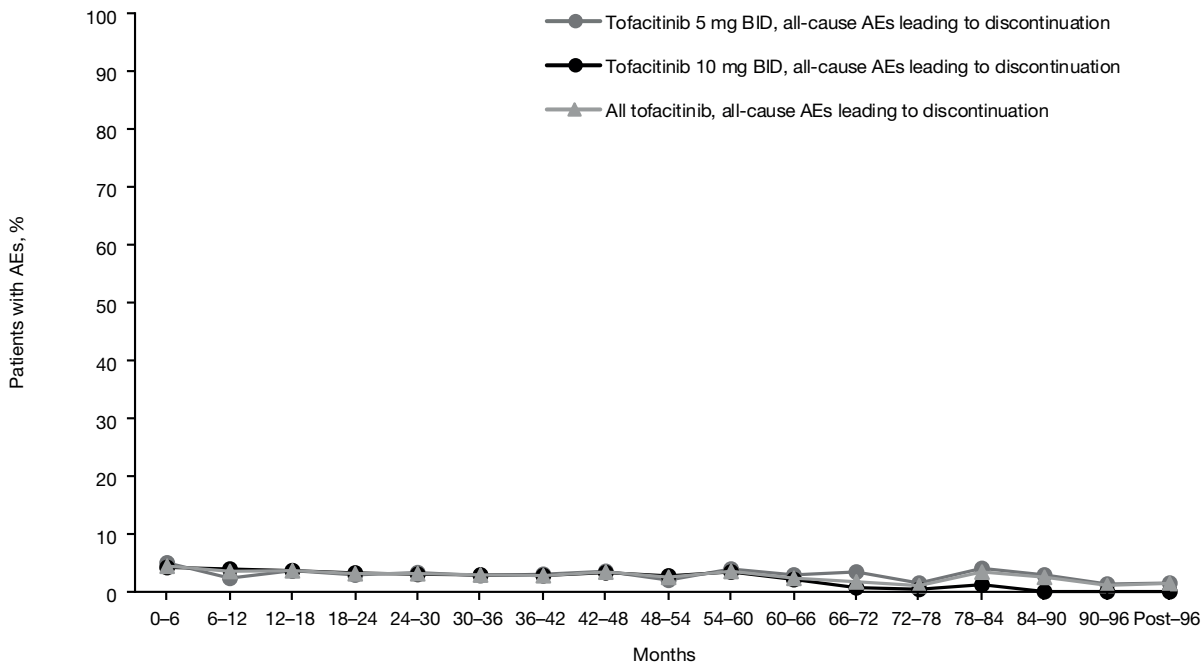

|            |      |      |      |      |      |      |      |      |      |      |      |      |     |     |     |     |     |
|------------|------|------|------|------|------|------|------|------|------|------|------|------|-----|-----|-----|-----|-----|
| 5 mg, N =  | 1123 | 1033 | 969  | 896  | 820  | 774  | 729  | 652  | 558  | 466  | 414  | 379  | 336 | 302 | 273 | 234 | 130 |
| 10 mg, N = | 3358 | 3121 | 2865 | 2660 | 2461 | 2288 | 2162 | 1843 | 1471 | 1172 | 918  | 670  | 262 | 86  | 42  | 34  | 15  |
| All, N =   | 4481 | 4154 | 3834 | 3556 | 3281 | 3062 | 2891 | 2495 | 2029 | 1638 | 1332 | 1049 | 598 | 388 | 315 | 268 | 145 |
