# Supplementary material for: Safety and efficacy of tofacitinib for up to 9.5 years in the treatment of rheumatoid arthritis: final results of a global, open-label, long-term extension study
Source: PubMed Central journal article supplement (PMC6451219; doi:10.1186/s13075-019-1866-2), 2019-04-05

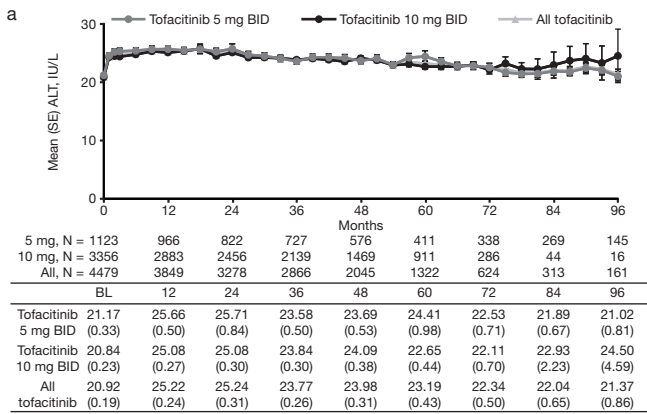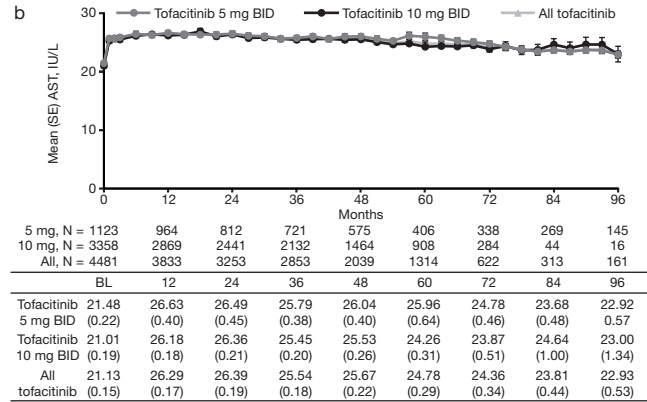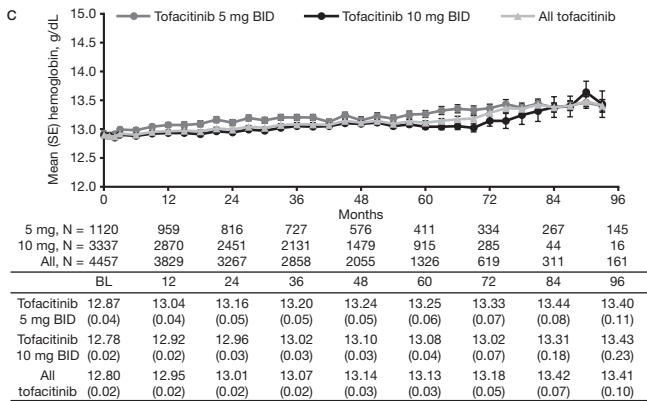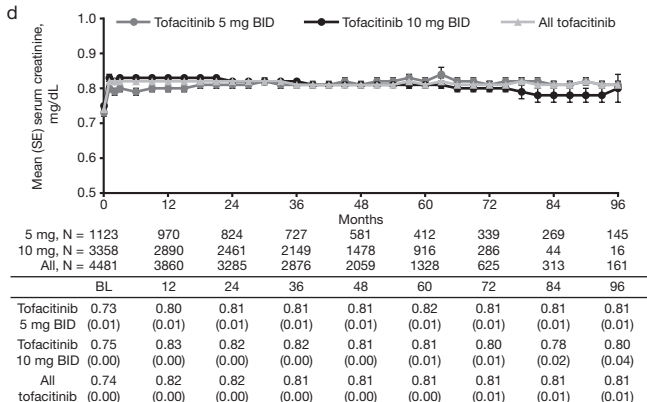

Supplement: 13075_2019_1866_MOESM6_ESM.pdf [file 13075_2019_1866_MOESM6_ESM.pdf]
