# Supplementary material for: Safety and efficacy of tofacitinib for up to 9.5 years in the treatment of rheumatoid arthritis: final results of a global, open-label, long-term extension study
Source: Springer Nature journal article supplement (doi:10.1186/s13075-019-1866-2), 2019-04-05
Supplement: MOESM8 [file 16619572]

**a**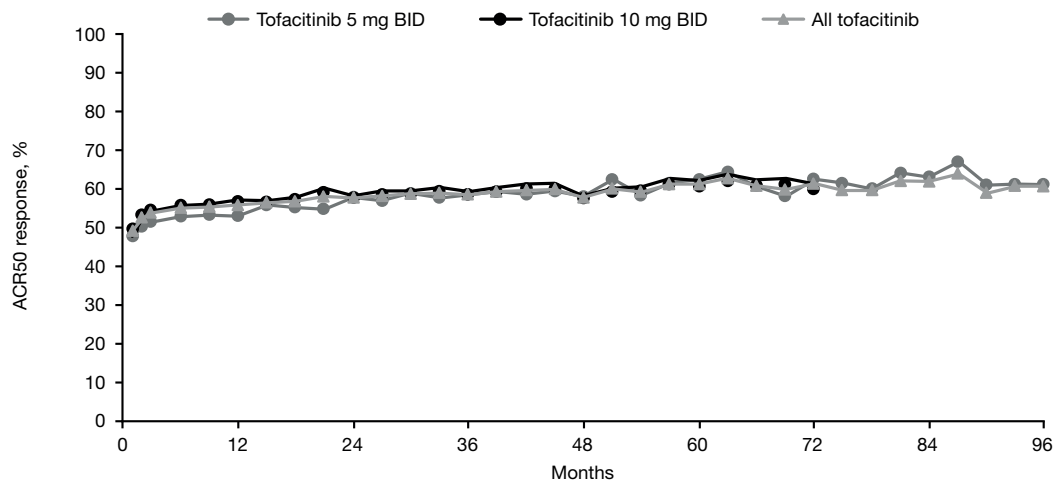

|                       | 0                | 12               | 24               | 36               | 48               | 60              | 72             | 84             | 96            |
|-----------------------|------------------|------------------|------------------|------------------|------------------|-----------------|----------------|----------------|---------------|
| 5 mg, N =             | 1114             | 972              | 824              | 730              | 581              | 411             | 339            | 271            | 144           |
| 10 mg, N =            | 3307             | 2891             | 2464             | 2157             | 1486             | 920             | 287            |                |               |
| All, N =              | 4421             | 3863             | 3288             | 2887             | 2067             | 1331            | 626            | 315            | 160           |
| n/N (%)               | 1                | 12               | 24               | 36               | 48               | 60              | 72             | 84             | 96            |
| Tofacitinib 5 mg BID  | 531/1114 (47.7)  | 515/972 (53.0)   | 476/824 (57.8)   | 427/730 (58.5)   | 337/581 (58.0)   | 257/411 (62.5)  | 212/339 (62.5) | 171/271 (63.1) | 88/144 (61.1) |
| Tofacitinib 10 mg BID | 1639/3307 (49.6) | 1640/2891 (56.7) | 1421/2464 (57.7) | 1262/2157 (58.5) | 856/1486 (57.6)  | 558/920 (60.7)  | 172/287 (59.9) | 24/44 (54.6)   | 9/16 (56.3)   |
| All tofacitinib       | 2170/4421 (49.1) | 2155/3863 (55.8) | 1897/3288 (57.7) | 1689/2887 (58.5) | 1193/2067 (57.7) | 815/1331 (61.2) | 384/626 (61.3) | 195/315 (61.9) | 97/160 (60.6) |

**b**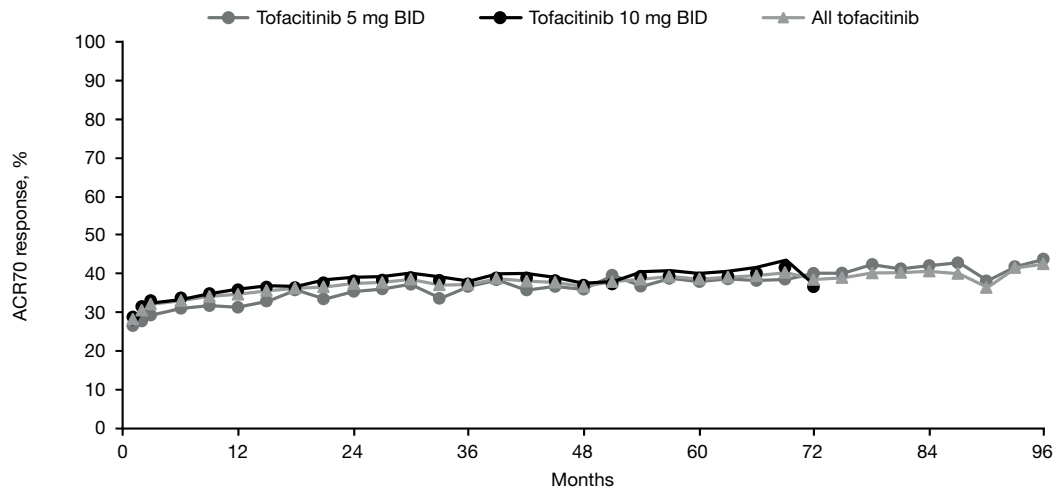

|                       | 0                | 12               | 24               | 36               | 48              | 60              | 72             | 84             | 96            |
|-----------------------|------------------|------------------|------------------|------------------|-----------------|-----------------|----------------|----------------|---------------|
| 5 mg, N =             | 1114             | 972              | 824              | 730              | 581             | 411             | 336            | 271            | 144           |
| 10 mg, N =            | 3307             | 2891             | 2464             | 2157             | 1486            | 920             | 287            |                |               |
| All, N =              | 4421             | 3863             | 3288             | 2887             | 2067            | 1331            | 626            | 315            | 160           |
| n/N (%)               | 1                | 12               | 24               | 36               | 48              | 60              | 72             | 84             | 96            |
| Tofacitinib 5 mg BID  | 297/1114 (26.7)  | 305/972 (31.4)   | 292/824 (35.4)   | 268/730 (36.7)   | 209/581 (36.0)  | 156/411 (38.0)  | 136/339 (40.1) | 114/271 (42.1) | 63/144 (43.8) |
| Tofacitinib 10 mg BID | 953/3307 (28.8)  | 1036/2891 (35.8) | 940/2464 (38.2)  | 807/2157 (37.4)  | 550/1486 (37.0) | 358/920 (38.9)  | 105/287 (36.6) | 14/44 (31.8)   | 5/16 (31.3)   |
| All tofacitinib       | 1250/4421 (28.3) | 1341/3863 (34.7) | 1232/3288 (37.5) | 1075/2887 (37.2) | 759/2067 (36.7) | 514/1331 (38.6) | 241/626 (38.5) | 128/315 (40.6) | 68/160 (42.5) |
