# Supplementary material for: Safety and efficacy of tofacitinib for up to 9.5 years in the treatment of rheumatoid arthritis: final results of a global, open-label, long-term extension study
Source: Springer Nature journal article supplement (doi:10.1186/s13075-019-1866-2), 2019-04-05
Supplement: MOESM9 [file 16619572]

**a**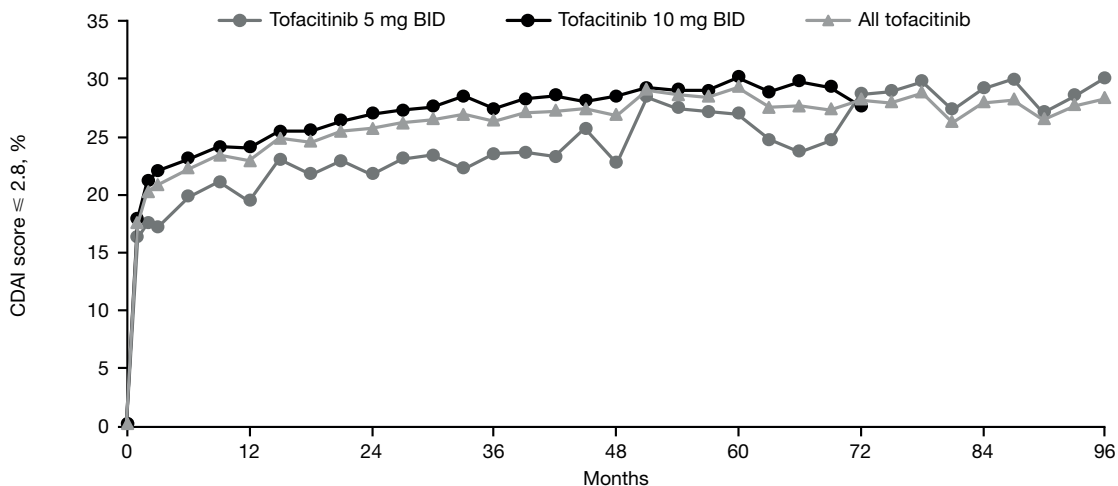

|            | 0    | 12   | 24   | 36   | 48   | 60   | 72  | 84  | 96  |
|------------|------|------|------|------|------|------|-----|-----|-----|
| 5 mg, N =  | 1075 | 971  | 822  | 727  | 580  | 408  | 338 | 271 | 143 |
| 10 mg, N = | 3284 | 2883 | 2453 | 2144 | 1474 | 915  | 286 |     |     |
| All, N =   | 4359 | 3854 | 3275 | 2871 | 2054 | 1323 | 624 | 315 | 159 |

| n/N (%)               | BL           | 1               | 12              | 24              | 36              | 48              | 60              | 72             | 84            | 96            |
|-----------------------|--------------|-----------------|-----------------|-----------------|-----------------|-----------------|-----------------|----------------|---------------|---------------|
| Tofacitinib 5 mg BID  | 2/1116 (0.2) | 175/1075 (16.3) | 189/971 (19.5)  | 179/822 (21.8)  | 171/727 (23.5)  | 132/580 (22.8)  | 110/408 (27.0)  | 97/338 (28.7)  | 79/271 (29.2) | 43/143 (30.1) |
| Tofacitinib 10 mg BID | 7/3308 (0.2) | 589/3284 (17.9) | 693/2883 (24.0) | 662/2453 (27.0) | 587/2144 (27.4) | 420/1474 (28.5) | 276/915 (30.2)  | 79/286 (27.6)  | 9/44 (20.5)   | 2/16 (12.5)   |
| All tofacitinib       | 9/4424 (0.2) | 764/4359 (17.5) | 882/3854 (22.9) | 841/3275 (25.7) | 758/2871 (26.4) | 552/2054 (26.9) | 386/1323 (29.2) | 176/624 (28.2) | 88/315 (27.9) | 45/159 (28.3) |

**b**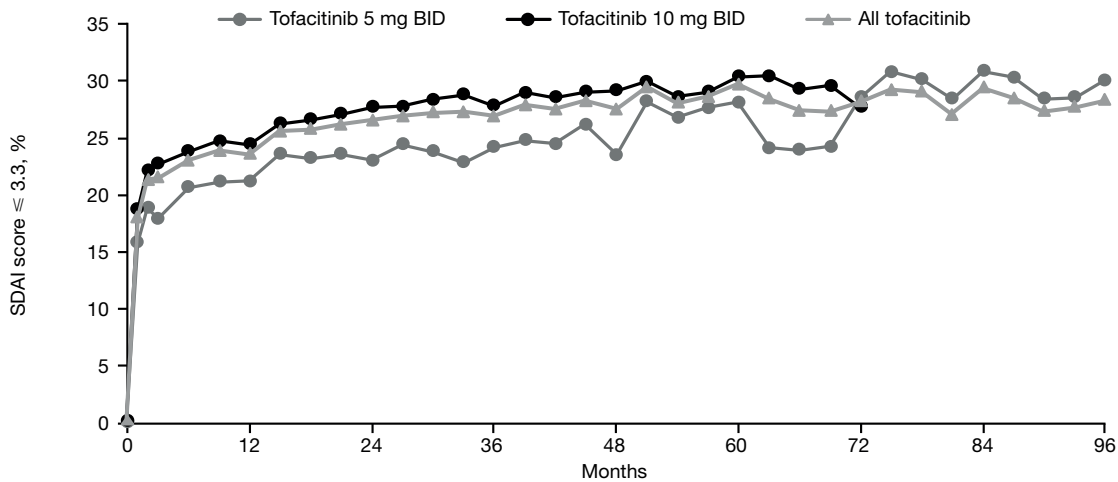

|            | 0    | 12   | 24   | 36   | 48   | 60   | 72  | 84  | 96  |
|------------|------|------|------|------|------|------|-----|-----|-----|
| 5 mg, N =  | 1061 | 961  | 811  | 724  | 578  | 405  | 336 | 269 | 143 |
| 10 mg, N = | 3219 | 2869 | 2449 | 2135 | 1462 | 909  | 285 |     |     |
| All, N =   | 4280 | 3830 | 3260 | 2859 | 2040 | 1314 | 621 | 313 | 159 |

| n/N (%)               | BL           | 1               | 12              | 24              | 36              | 48              | 60              | 72             | 84            | 96            |
|-----------------------|--------------|-----------------|-----------------|-----------------|-----------------|-----------------|-----------------|----------------|---------------|---------------|
| Tofacitinib 5 mg BID  | 1/1105 (0.1) | 168/1061 (15.8) | 204/961 (21.2)  | 187/811 (23.1)  | 175/724 (24.2)  | 136/578 (23.5)  | 114/405 (28.2)  | 96/336 (28.6)  | 83/269 (30.9) | 43/143 (30.1) |
| Tofacitinib 10 mg BID | 7/3301 (0.2) | 603/3219 (18.7) | 700/2869 (24.4) | 678/2449 (27.7) | 594/2135 (27.8) | 426/1462 (29.1) | 276/909 (30.4)  | 79/285 (27.7)  | 9/44 (20.5)   | 2/16 (12.5)   |
| All tofacitinib       | 8/4406 (0.2) | 771/4280 (18.0) | 904/3830 (23.6) | 865/3260 (26.5) | 769/2859 (26.9) | 562/2040 (27.6) | 390/1314 (29.7) | 175/621 (28.2) | 92/313 (29.4) | 45/159 (28.3) |
